# Supplementary material
Source: PubMed Central journal article supplement (PMC3148116)
Supplement: Supp_Data.pdf [file Supp_Data.pdf]

SUPPLEMENTARY DATA

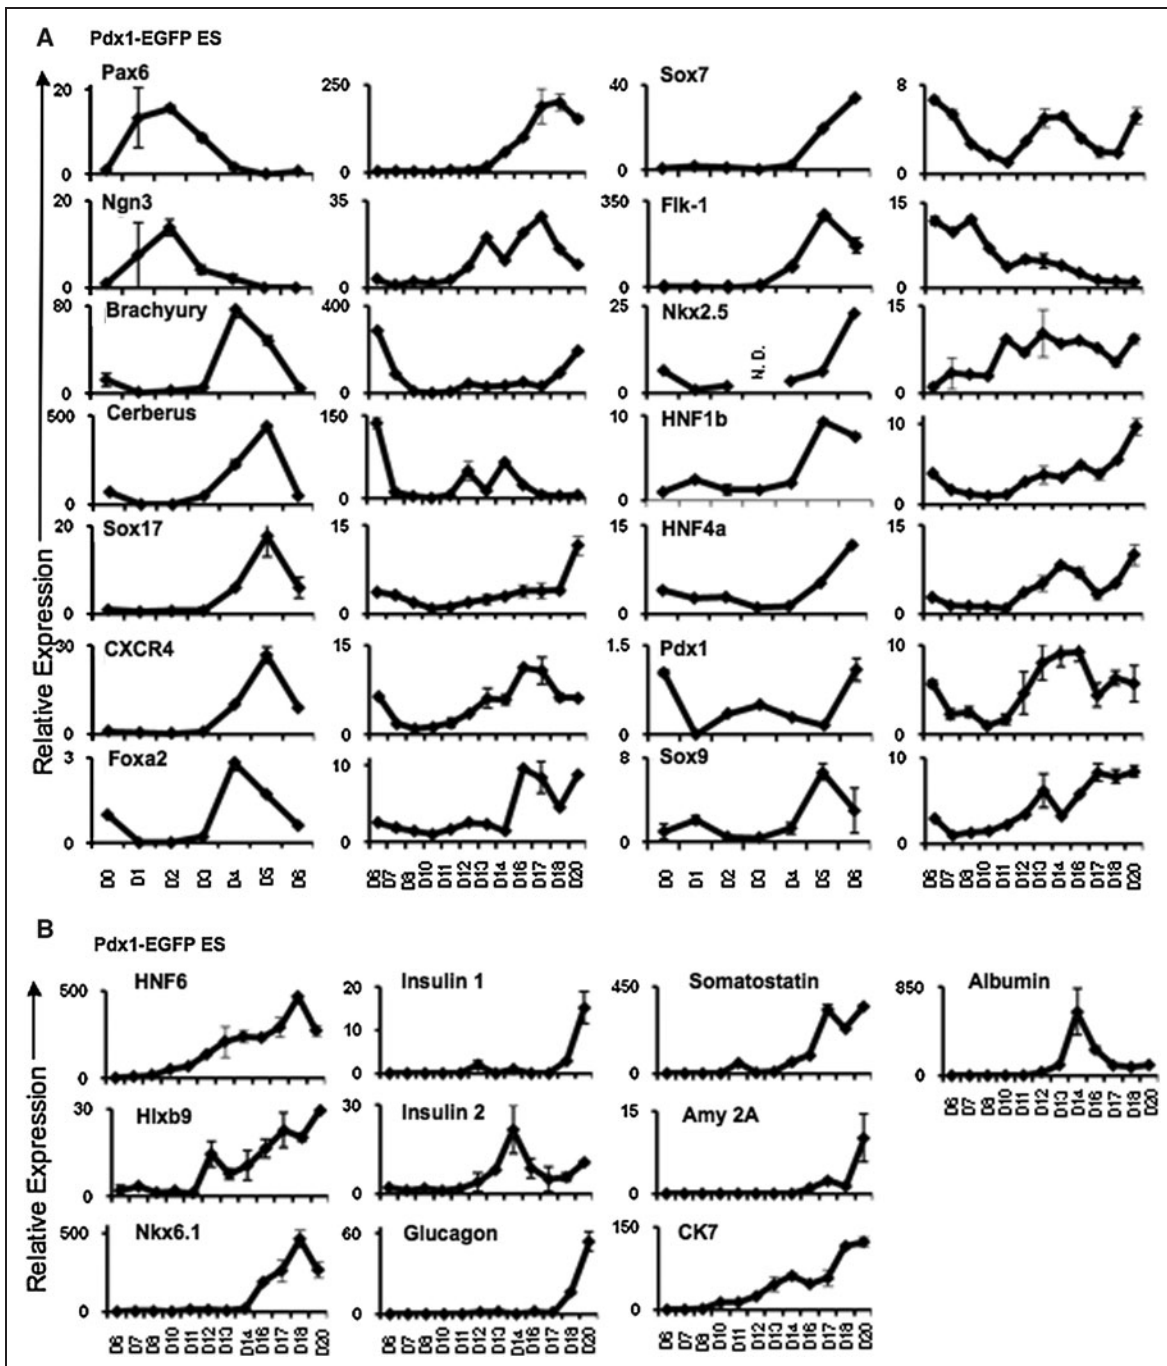

**Supplementary Fig. S1.** Kinetics studies of endogenous gene expression during *in vitro* differentiation of Pdx1-EGFP ES cells (Micallef *et al.*, *Stem Cell Res* 2007;1:25–36). Quantitative reverse transcription (RT)–PCR with Taqman probes was performed.  $\beta$ -Actin was used as internal control in these experiments. Data represent the mean and standard deviation from duplicated samples. Pdx1, pancreatic and duodenal homeobox 1; EGFP, enhanced green fluorescent protein; ES, embryonic stem; PCR, polymerase chain reaction.

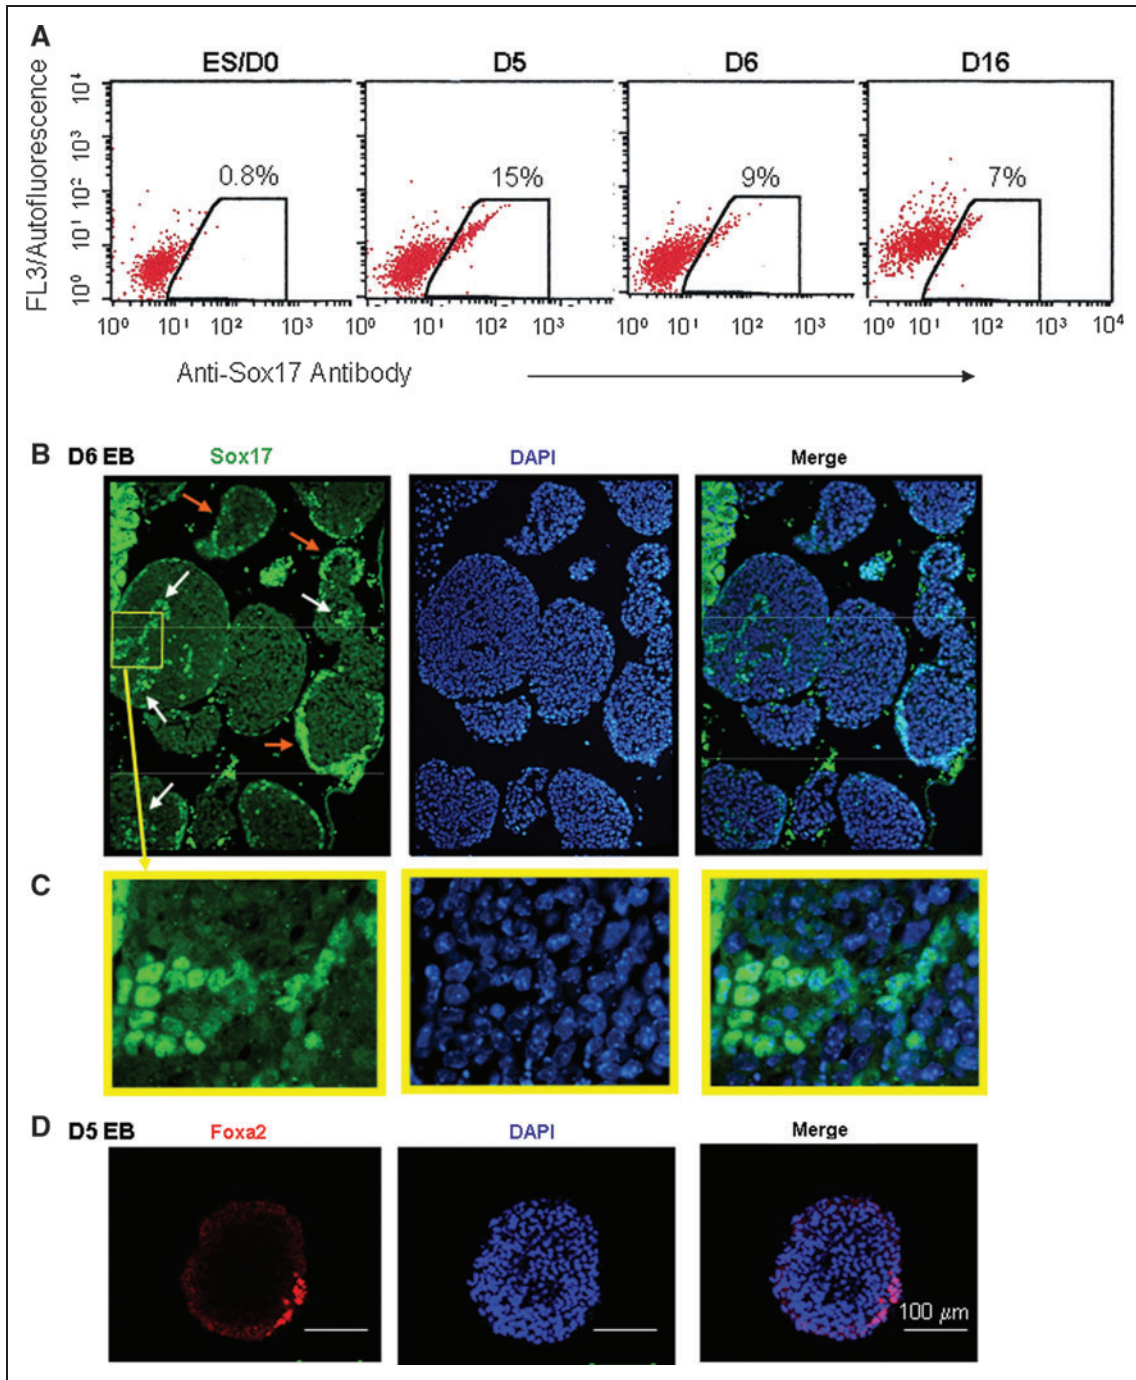

**Supplementary Fig. S2.** Protein expression of endogenous Sox17 or Foxa2 in embryoid body and/or attachment culture stages. R1 ES cells were differentiated. **(A)** Representative fluorescent flow cytometric analysis of Sox17 expression. **(B)** Representative immunohistological staining of Sox17. White arrows indicate intra-embryoid body staining of Sox17. Orange arrows indicate areas of outer epithelial layer that are positive for Sox17. Bright green-stained areas that are nonoverlapping with the DAPI staining are nonspecific. Magnification: 200 $\times$ . **(C)** The area indicated by the yellow box in **B**. Magnification: 1000 $\times$ . **(D)** Representative immunohistological staining of Foxa2. DAPI, 4',6-diamidino-2-phenylindole.

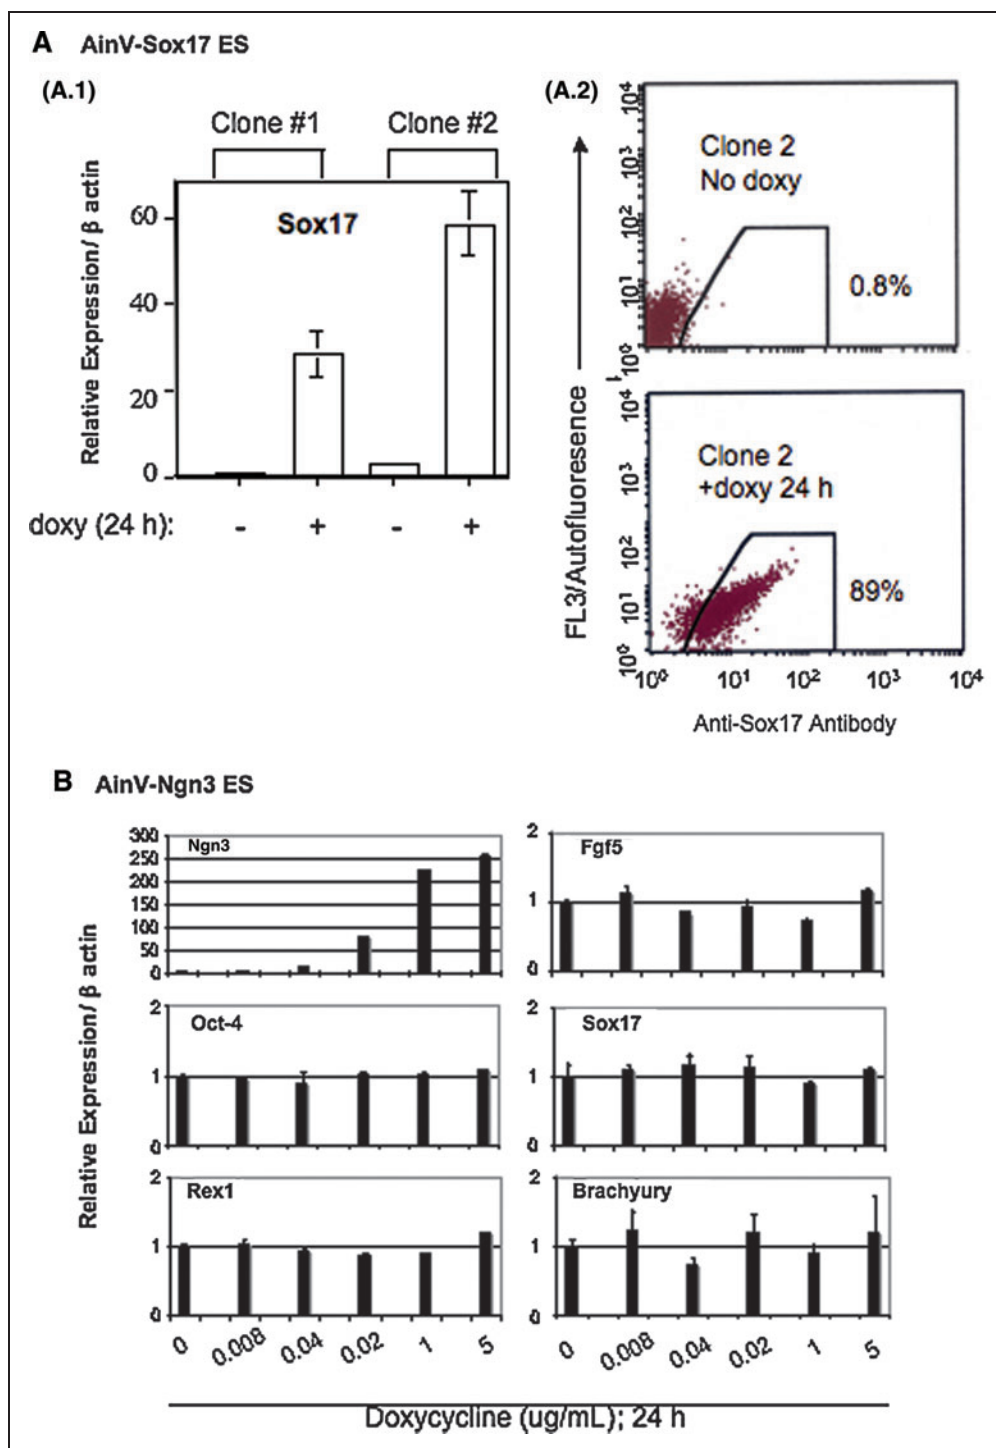

**Supplementary Fig. S3.** Characterization of inducible AinV-Sox17 (A), AinV-Ngn3 (B), or A2lox-MafA (C) ES cell clones. (A.1) Quantitative RT-PCR analysis of Sox17 transcripts after addition of 1  $\mu$ g/mL doxycycline to two undifferentiated AinV-Sox17 ES clones for 24 h. (A.2) Representative fluorescent flow cytometric analysis of Sox17 expression, with or without 24 h of doxycycline treatment, on undifferentiated AinV-Sox17 ES Clone #2. (B) A clone of AinV-Ngn3 ES cells was treated with designated graded doses of doxycycline for 24 h and analyzed for gene expression of the markers by quantitative RT-PCR. (C.1) Quantitative RT-PCR analysis of MafA transcripts after addition of 1  $\mu$ g/mL doxycycline to two undifferentiated A2lox-MafA ES clones for 24 h. (C.2) Representative fluorescent flow cytometric analysis of MafA protein expression, with 24 h of doxycycline treatment, on undifferentiated Clone #5. (C.3) Clone #5, after treatment with or without doxycycline for 24 h, was analyzed by quantitative RT-PCR. Data represent the mean and standard deviation from duplicated samples. Ngn3, neurogenin3.

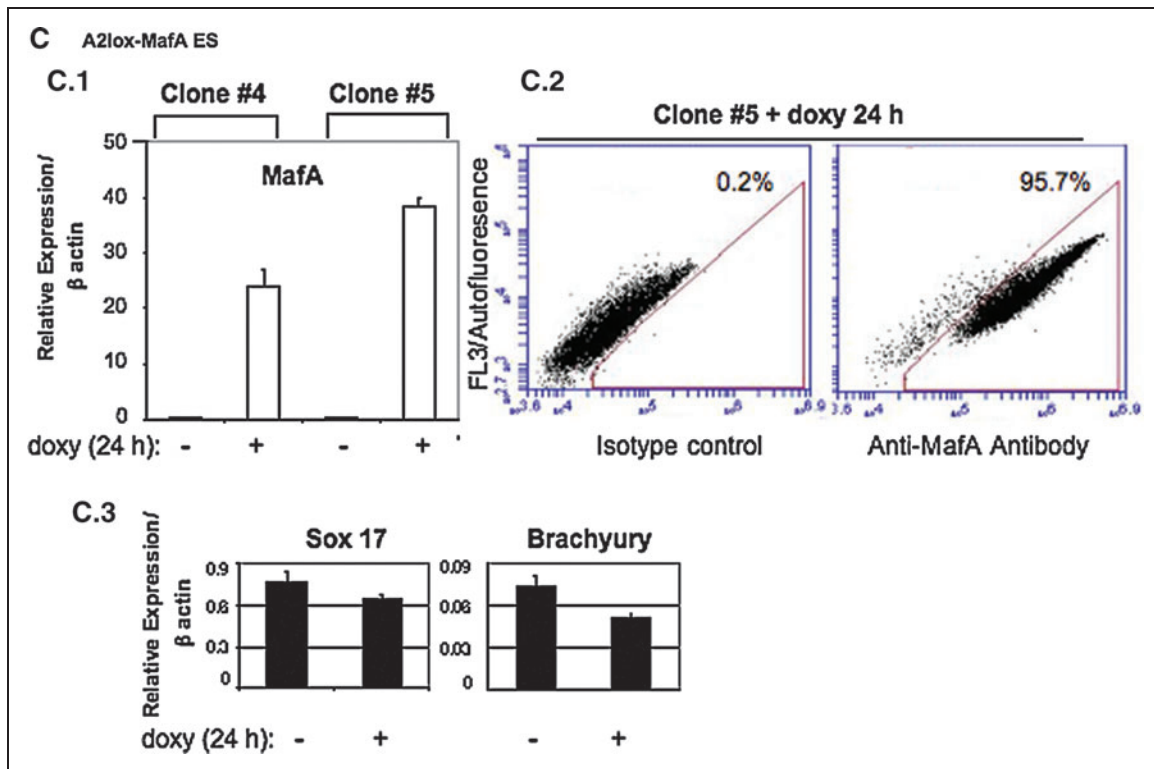

Supplementary Fig. S3. (Continued).

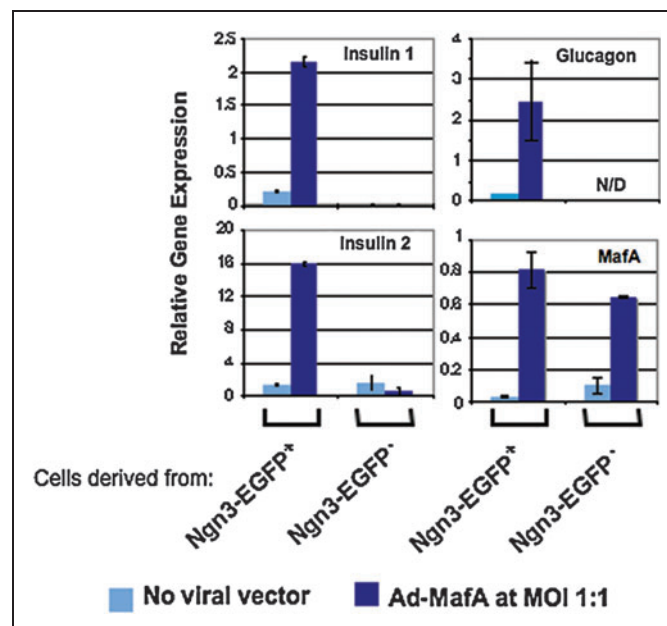

Supplementary Fig. S4. Effects of overexpression of MafA in sorted Ngn3-EGFP-expressing cells derived from day 16 culture. Ngn3-EGFP ES cells (Lee *et al.*, *Genes Dev* 2002;16:1488–1497), which contain an EGFP reporter gene knock-in to one allele of Ngn3, were differentiated. On day 16, cells were sorted into Ngn3-EGFP<sup>+</sup> or Ngn3-EGFP<sup>-</sup> populations and were plated onto Matrigel and methylcellulose-containing semisolid media, as established and described in our earlier work (Ku *et al.*, *Diabetes* 2007;56:921–929), for 8 days in the presence or absence of an adenoviral vector carrying MafA at an MOI of 1:1. At the end of the culture, cells were procured and analyzed by quantitative RT-PCR. Data represent the mean and standard deviation from duplicated samples. MOI, multiplicity of infection.
